# Supplementary material for: Modeling disordered protein interactions from biophysical principles
Source: PubMed Central journal article supplement (PMC5402988; doi:10.1371/journal.pcbi.1005485), 2017-04-10
Supplement: pcbi.1005485.s011.pdf [file pcbi.1005485.s011.pdf]

S1 Table: Accuracy cutoffs used by CAPRI

| Quality    | $f_{nat}$  | L-RMSD              |    | I-RMSD             |
|------------|------------|---------------------|----|--------------------|
| High       | $\geq 0.5$ | $\leq 1.0$          | or | $\leq 1.0$         |
| Medium     | $\geq 0.3$ | $1.0 < x \leq 5.0$  | or | $1.0 < x \leq 2.0$ |
| Acceptable | $\geq 0.1$ | $5.0 < x \leq 10.0$ | or | $2.0 < x \leq 4.0$ |
| Incorrect  | $< 0.1$    |                     |    |                    |

The four quality levels of docking models used in the Critical Assessment of Predicted Interactions (CAPRI) and their criteria.  $f_{nat}$ : the fraction of native contacts that are reproduced in a predicted docking model. Native contacts are defined as pairs of residues from interacting proteins with any heavy atoms within 5.0 Å of each other. L-RMSD: Ligand RMSD, the backbone (N, C $_{\alpha}$ , C, O) RMSD of the ligand (here docked IDP) after superimposition of a docking model to its native complex structure using the receptor structure. I-RMSD: Interface RMSD, the backbone (N, C $_{\alpha}$ , C, O) RMSD of the interface residues. An interface residue is defined as having any heavy atom within 10.0 Å of any heavy atom in a docked partner protein. Adapted from [39].
