# Supplementary material for: Modeling disordered protein interactions from biophysical principles
Source: PubMed Central journal article supplement (PMC5402988; doi:10.1371/journal.pcbi.1005485), 2017-04-10
Supplement: pcbi.1005485.s015.pdf [file pcbi.1005485.s015.pdf]

S5 Table: Scoring function performance on relaxed models

| Score                              | Mean RFH | Complexes with RFH in top: |    |     |
|------------------------------------|----------|----------------------------|----|-----|
|                                    |          | 1                          | 10 | 100 |
| DFIRE                              | 36.7     | 4                          | 8  | 16  |
| GOAP                               | 16.4     | 4                          | 9  | 18  |
| ITScorePro                         | 23.3     | 2                          | 12 | 17  |
| Molecular mechanics                | 28.9     | 4                          | 9  | 16  |
| Min. Z-score                       | 15.0     | 3                          | 9  | 18  |
| Linear combination 4               | 12.0     | 3                          | 11 | 18  |
| Linear combination 5 (Model Score) | 11.3     | 3                          | 11 | 18  |
| Random                             | 38.6     | 0                          | 7  | 16  |

To re-rank models after refinement in Step 4, four single scoring terms and two linear combinations were evaluated.

RFH: numerical rank of the first hit (good model); Min. Z-score: for each path, the lowest Z-score among ITScorePro, DFIRE, molecular mechanics score, and GOAP; Linear combination 4: Weights on ITScorePro, DFIRE, molecular mechanics score, and GOAP ( $w_1$ - $w_4$  in Eqn 4); Linear combination 5: Weights on “Min. Z-score” and “Trained 4” ( $w_5$  in Eqn 4). A path is considered a hit if it meets CAPRI “Acceptable” criteria (S1 Table). Random values were estimated by shuffling the models 1000 times. Weights were trained using 1devAB, 1fv1ABC, 1ijjAB, 1ipbAB, 1j3hAI, 1jpwAD, 1kxhAB, 1l8cAB, 1p4qBA, 1pq0AB, 1sb0AB, 1sqkAB, 1u2nAB, 1wkwAB, 1xtfAB, 1xtgAB, 1ycrAB, 2bzwAB, 2c1tAC, 2cpkEI, 2z6hAD, and 3owtABC. Values are reported for these training complexes.
