# Supplementary material for: Modeling disordered protein interactions from biophysical principles
Source: PubMed Central journal article supplement (PMC5402988; doi:10.1371/journal.pcbi.1005485), 2017-04-10
Supplement: pcbi.1005485.s016.pdf [file pcbi.1005485.s016.pdf]

S6 Table: MD-based protein-peptide docking test set

| Receptor name                        | Peptide sequence | Bound  |       |    | Unbound |
|--------------------------------------|------------------|--------|-------|----|---------|
|                                      |                  | PDB ID | chain | L  | PDB ID  |
| Androgen receptor                    | SSRFESLFAGEKESR  | 1t7rA  | B     | 15 | 2am9A   |
| CheY                                 | ASQDQVDDLLDSLGF  | 2fmfA  | B     | 15 | 1jbeA   |
| Serine threonine protein kinase PIM1 | ARKRRRHPSGPPTA   | 2c3iB  | A     | 14 | 2j2iB   |
| Sh3 domain                           | EGPPPAMPARPT     | 1sshA  | B     | 12 | 1ootA   |
| Mineralocorticoid receptor           | QQKSLQQLLQTE     | 2a3iA  | B     | 12 | 2aa2A   |
| PPAR alpha                           | ARHKILHRLQEQ     | 2p54A  | B     | 12 | 1i7gA   |
| AP-2 complex subunit alpha-2         | NPKGWVTFEEEE     | 2vj0A  | P     | 12 | 1b9kA   |
| Proliferating cell nuclear antigen   | KSTQATLERWF      | 1rxzA  | B     | 11 | 1rwzA   |

All protein-peptide test cases with  $\geq 11$  amino acid peptides from MD-based protein-peptide docking test sets [18], [19].
