# Supplementary material for: Modeling disordered protein interactions from biophysical principles
Source: PubMed Central journal article supplement (PMC5402988; doi:10.1371/journal.pcbi.1005485), 2017-04-10
Supplement: pcbi.1005485.s017.pdf [file pcbi.1005485.s017.pdf]

S7 Table: 2-fold cross validation for optimizing Path and Model Scores

| Group 1 testing performance |            |     |                |            |     |
|-----------------------------|------------|-----|----------------|------------|-----|
| Bound PDB ID                | Recall (%) | RFH | Unbound PDB ID | Recall (%) | RFH |
| 1ycrA                       | 19.8       | 1   | 1z1mA          | 15.2       | 3   |
| 1wkWA                       | 5.3        | 46  | 1ipbA          | 4.1        | 23  |
| 1sb0A                       | 14.1       | 4   | 4i9oA          | 2.7        | 107 |
| 2bzwA                       | 31.1       | 1   | 1pq0A          | -          | -   |
| 1devA                       | 1.1        | 13  | 1kxhA          | 1.1        | 7   |
| 1jpwA                       | 2.3        | 2   | 2z6hA          | 13.1       | 8   |
| 2c1tA                       | -          | -   | 1bk5A          | -          | -   |
| Group 2 testing performance |            |     |                |            |     |
| Bound PDB ID                | Recall (%) | RFH | Unbound PDB ID | Recall (%) | RFH |
| 1fv1AB                      | 10.1       | 11  | 4ah2AB         | 10.1       | 1   |
| 2cpkE                       | 3.3        | 7   | 1j3hA          | 2.4        | 12  |
| 1sqkA                       | 10.3       | 17  | 1ijjA          | 20.3       | 6   |
| 3owtAB                      | 3.5        | 2   | 3cz6AB         | 3.9        | 49  |
| 1p4qB                       | 10.9       | 9   | 1l3eB          | 11.6       | 2   |
| 1l8cA                       | 4.6        | 93  | 1u2nA          | 5.7        | 15  |
| 1xtgA                       | 100.0      | 1   | 1xtfA          | -          | -   |

Group 1 testing performance shows prediction results using the weights trained on the group 2 complexes, and vice versa. Recall: the number of hits retrieved by the trained score divided by the total number of hits. This is to evaluate the performance of Path Score. RFH: numerical rank of the first hit (good model). This is to evaluate the performance of Model Score. Dash (-) indicates that the complex had no hits.
